# Supplementary material for: Epidemiology of Injuries in Men’s Professional and Amateur Football (Part I)
Source: MDPI journal article supplement (doi:10.3390/jcm12175569), 2023-08-26
Supplement: s1 [file s1]

# Additional material

Table S1 PRISMA checklist

| Section/topic                      |    | Checklist item                                                                                                                                                                                                                                                                                              | Reported on page # |
|------------------------------------|----|-------------------------------------------------------------------------------------------------------------------------------------------------------------------------------------------------------------------------------------------------------------------------------------------------------------|--------------------|
| <b>TITLE</b>                       |    |                                                                                                                                                                                                                                                                                                             |                    |
| Title                              | 1  | Identify the report as a systematic review, meta-analysis, or both.                                                                                                                                                                                                                                         |                    |
| <b>ABSTRACT</b>                    |    |                                                                                                                                                                                                                                                                                                             |                    |
| Structured summary                 | 2  | Provide a structured summary including, as applicable: background; objectives; data sources; study eligibility criteria, participants, and interventions; study appraisal and synthesis methods; results; limitations; conclusions and implications of key findings; systematic review registration number. |                    |
| <b>INTRODUCTION</b>                |    |                                                                                                                                                                                                                                                                                                             |                    |
| Rationale                          | 3  | Describe the rationale for the review in the context of what is already known.                                                                                                                                                                                                                              |                    |
| Objectives                         | 4  | Provide an explicit statement of questions being addressed with reference to participants, interventions, comparisons, outcomes, and study design (PICOS).                                                                                                                                                  |                    |
| <b>METHODS</b>                     |    |                                                                                                                                                                                                                                                                                                             |                    |
| Protocol and registration          | 5  | Indicate if a review protocol exists, if and where it can be accessed (e.g., Web address), and, if available, provide registration information including registration number.                                                                                                                               |                    |
| Eligibility criteria               | 6  | Specify study characteristics (e.g., PICOS, length of follow-up) and report characteristics (e.g., years considered, language, publication status) used as criteria for eligibility, giving rationale.                                                                                                      |                    |
| Information sources                | 7  | Describe all information sources (e.g., databases with dates of coverage, contact with study authors to identify additional studies) in the search and date last searched.                                                                                                                                  |                    |
| Search                             | 8  | Present full electronic search strategy for at least one database, including any limits used, such that it could be repeated.                                                                                                                                                                               |                    |
| Study selection                    | 9  | State the process for selecting studies (i.e., screening, eligibility, included in systematic review, and, if applicable, included in the meta-analysis).                                                                                                                                                   |                    |
| Data collection process            | 10 | Describe method of data extraction from reports (e.g., piloted forms, independently, in duplicate) and any processes for obtaining and confirming data from investigators.                                                                                                                                  |                    |
| Data items                         | 11 | List and define all variables for which data were sought (e.g., PICOS, funding sources) and any assumptions and simplifications made.                                                                                                                                                                       |                    |
| Risk of bias in individual studies | 12 | Describe methods used for assessing risk of bias of individual studies (including specification of whether this was done at the study or outcome level), and how this information is to be used in any data synthesis.                                                                                      |                    |
| Summary measures                   | 13 | State the principal summary measures (e.g., risk ratio, difference in means).                                                                                                                                                                                                                               |                    |
| Synthesis of results               | 14 | Describe the methods of handling data and combining results of studies, if done, including measures of consistency (e.g., <i>I</i> <sup>2</sup> ) for each meta-analysis.                                                                                                                                   |                    |
| Risk of bias across studies        | 15 | Specify any assessment of risk of bias that may affect the cumulative evidence (e.g., publication bias, selective reporting within studies).                                                                                                                                                                |                    |
| Additional analyses                | 16 | Describe methods of additional analyses (e.g., sensitivity or subgroup analyses, meta-regression), if done, indicating which were pre-specified.                                                                                                                                                            |                    |
| <b>RESULTS</b>                     |    |                                                                                                                                                                                                                                                                                                             |                    |
| Study selection                    | 17 | Give numbers of studies screened, assessed for eligibility, and included in the review, with reasons for exclusions at each stage, ideally with a flow diagram.                                                                                                                                             |                    |
| Study characteristics              | 18 | For each study, present characteristics for which data were extracted (e.g., study size, PICOS, follow-up period) and provide the citations.                                                                                                                                                                |                    |
| Risk of bias within studies        | 19 | Present data on risk of bias of each study and, if available, any outcome level assessment (see item 12).                                                                                                                                                                                                   |                    |

|                               |    |                                                                                                                                                                                                          |
|-------------------------------|----|----------------------------------------------------------------------------------------------------------------------------------------------------------------------------------------------------------|
| Results of individual studies | 20 | For all outcomes considered (benefits or harms), present, for each study: (a) simple summary data for each intervention group (b) effect estimates and confidence intervals, ideally with a forest plot. |
| Synthesis of results          | 21 | Present results of each meta-analysis done, including confidence intervals and measures of consistency.                                                                                                  |
| Risk of bias across studies   | 22 | Present results of any assessment of risk of bias across studies (see Item 15).                                                                                                                          |
| Additional analysis           | 23 | Give results of additional analyses, if done (e.g., sensitivity or subgroup analyses, meta-regression [see Item 16]).                                                                                    |
| <b>DISCUSSION</b>             |    |                                                                                                                                                                                                          |
| Summary of evidence           | 24 | Summarize the main findings including the strength of evidence for each main outcome; consider their relevance to key groups (e.g., healthcare providers, users, and policy makers).                     |
| Limitations                   | 25 | Discuss limitations at study and outcome level (e.g., risk of bias), and at review-level (e.g., incomplete retrieval of identified research, reporting bias).                                            |
| Conclusions                   | 26 | Provide a general interpretation of the results in the context of other evidence, and implications for future research.                                                                                  |
| <b>FUNDING</b>                |    |                                                                                                                                                                                                          |
| Funding                       | 27 | Describe sources of funding for the systematic review and other support (e.g., supply of data); role of funders for the systematic review.                                                               |

From: Moher et al. (2009) [117]

**Table S2** Definitions used to include studies in systematic review

| Term               | Definition                                                                                                                                                                                                                                                                                                                                                          |
|--------------------|---------------------------------------------------------------------------------------------------------------------------------------------------------------------------------------------------------------------------------------------------------------------------------------------------------------------------------------------------------------------|
| Injury             | Any physical complaint sustained by a player that results from a football match or football training, irrespective of the need for medical attention or time loss from football activities                                                                                                                                                                          |
| Time loss injury   | Injury that results in a player being unable to take a full part in future Football training or match play.                                                                                                                                                                                                                                                         |
| Recurrent injury   | Injury of the same type and at the same site as an index injury and which occurs after a player's return to full participation from the index injury.                                                                                                                                                                                                               |
| Injury severity    | The number of days that have elapsed from the date of injury to the date of the player's return to full participation in team training, and availability for match selection. Injuries are grouped as:<br>Slight / Minimal Absence (1-3 days);<br>Minor / Mild Absence (4-7 days);<br>Moderate Absence (8-28 days);<br>Major / Severe Absence (>28 days).           |
| Match exposure     | Play between teams from different clubs.                                                                                                                                                                                                                                                                                                                            |
| Training exposure  | Team-based and individual physical activities under the control or guidance of the team's coaching or fitness staff that are aimed at maintaining or improving players' football skills or physical condition.                                                                                                                                                      |
| Traumatic injury:  | Injury with sudden onset and known cause.                                                                                                                                                                                                                                                                                                                           |
| Sprain             | Acute distraction injury of ligaments or joint capsules                                                                                                                                                                                                                                                                                                             |
| Strain             | Acute distraction injury of muscles and tendons                                                                                                                                                                                                                                                                                                                     |
| Contusion          | Tissue bruise without concomitant injuries classified                                                                                                                                                                                                                                                                                                               |
| Fracture           | Traumatic break of bone                                                                                                                                                                                                                                                                                                                                             |
| Dislocation        | Partial or complete displacement of the bony parts of a joint                                                                                                                                                                                                                                                                                                       |
| Other              | Injuries not classified elsewhere (wound, concussion).                                                                                                                                                                                                                                                                                                              |
| Overuse            | A pain syndrome of the musculoskeletal system with.                                                                                                                                                                                                                                                                                                                 |
| Contact Injury     | An injury caused by external influence (any contact with another player or object).                                                                                                                                                                                                                                                                                 |
| Non-contact injury | An injury that occurred without external influence.                                                                                                                                                                                                                                                                                                                 |
| Location of injury | <ul style="list-style-type: none"> <li>• Head and neck (Head/face; Neck/cervical spine);</li> <li>• Upper limbs (Shoulder/clavicle; Arm; Elbow; Forearm; Wrist; Hand/finger/thumb);</li> <li>• Trunk (Sternum/ribs/upper back; Abdomen; Lower back/pelvis/sacrum);</li> <li>• Lower Limbs (Hip/Groin; Thigh; Knee; Lower Leg/Achilles; Ankle; Foot/Toe).</li> </ul> |
| Injury incidence   | Number of injuries per 1000 player hours = $[(\Sigma \text{injuries} / \Sigma \text{exposure hours}) \times 1000]$ .                                                                                                                                                                                                                                                |

|                               |                                                                                                                                                                                 |
|-------------------------------|---------------------------------------------------------------------------------------------------------------------------------------------------------------------------------|
|                               |                                                                                                                                                                                 |
| Confidence intervals          | 95% confidence intervals = $[Incidence \times e^{(1.96 \times \sqrt{(1/injuries)})}]$                                                                                           |
| Professional football players | Players who belong to teams engaged in professional national Football leagues. Frequently, these leagues are the country's two highest divisions [first league, second league]. |
| Level of play                 |                                                                                                                                                                                 |
| International                 | UEFA defines international football as a "match between two national teams composed of the best eligible players."                                                              |
| Elite                         | The highest national football league.                                                                                                                                           |
| Amateur                       | Only league below the highest national football league.                                                                                                                         |

Häggglund et al. (2005) [16]; Fuller et al. (2006) [34]; Lopez et al. (2020) [20]; Source: Lindenfeld, et al. (1988) [118]

**Table S3** Characteristics of the studies included in the review: General descriptors of study;  
Description of the study population (n=48)

| Study                            | Article Title                                                                                                              | Region              | Study Design                      | Status                                  | Number players | Mean $\pm$ SD age, years          | Duration study                    |
|----------------------------------|----------------------------------------------------------------------------------------------------------------------------|---------------------|-----------------------------------|-----------------------------------------|----------------|-----------------------------------|-----------------------------------|
| Arnason et al., 2005 [35]        | No Effect of a Video-Based Awareness Program on the Rate of Soccer Injuries                                                | Iceland             | Prospective cohort study          | Professional Elite and Premier Division | 271            | 24.0 (16-38)                      | May-September 2000                |
| Aus der Fünten et al., 2014 [36] | Injury Characteristics in the German Professional Male Soccer Leagues After a Shortened Winter Break                       | Germany             | Prospective cohort study          | Professional football leagues           | 184<br>188     | 25.2 $\pm$ 4.1<br>25.2 $\pm$ 4.3  | 2 Seasons: 2008-2009<br>2009-2010 |
| Aus der Fünten et al., 2023 [23] | Epidemiology of Football Injuries of the German Bundesliga: A Media-Based, Prospective Analysis over 7 Consecutive Seasons | Germany             | Prospective cohort study          | Professional Premier League             | 650            | 25 $\pm$ 4.0                      | 7 Seasons: 2014-2015 to 2020-2021 |
| Bayne et al., 2018 [37]          | Incidence of injury and illness in South African professional male soccer players: a prospective cohort study              | South Africa        | Prospective cohort study          | Professional                            | 56             | -                                 | 10 Months 2015-2016               |
| 5. Brito et al., 2012 [25]       | Injuries in Portuguese Youth Soccer Players During Training and Match Play                                                 | Portugal            | Descriptive epidemiological study | Young amateur footballers U-19          | 674<br>161     | Different ages<br>17-18 years old | 1 Season August 2008-June 2009    |
| Dupont et al., 2010; France [38] | Effect of 2 Soccer Matches in a Week on Physical Performance and Injury Rate                                               | France              | Prospective cohort study          | Professional Level: Top UEFA            | 32             | 25.6 $\pm$ 3.8                    | 2 Seasons 2007-2008; 2008-2009    |
| Dvorak et al., 2011 [39]         | Injuries and illnesses of football players during the 2010 FIFA World Cup                                                  | FIFA World Cup 2010 |                                   | Elite Professional                      | 533            |                                   | Year: 2010                        |
| Eirale et al., 2010 [40]         | Injury epidemiology in a national football team of the Middle East                                                         | Qatar               | Prospective epidemiological study | Professional soccer                     | 36             | 23.8                              | 17 Months June 2007-October 2008  |
| Eirale et al., 2013 [41]         | Epidemiology of football injuries in Asia: A prospective study in Qatar                                                    | Qatar               | Prospective cohort study          | Professional First division             | 230            | 28.4 $\pm$ 4.4                    | August 2008-April 2009            |

|                             |                                                                                                                                                                                                            |                                                       |                          |                                       |                                        |                                   |                                                                 |
|-----------------------------|------------------------------------------------------------------------------------------------------------------------------------------------------------------------------------------------------------|-------------------------------------------------------|--------------------------|---------------------------------------|----------------------------------------|-----------------------------------|-----------------------------------------------------------------|
| Ekstrand et al., 1990 [42]  | The incidence of ankle sprains in soccer                                                                                                                                                                   | Sweden                                                | Prospective cohort study | Professional<br>Different divisions   | 315                                    | -                                 | 1 Year                                                          |
| Ekstrand et al., 2004a [43] | A congested football calendar and the wellbeing of players: correlation between match exposure of European footballers before the World Cup 2002 and their injuries and performances during that World Cup | Europe (World Cup and Non-World Cup)                  | Prospective cohort study | Professional                          | 266                                    | 26                                | 10 Months; July 2001-May 2002                                   |
| Ekstrand et al., 2004b [44] | Risk for injury when playing in a national football team                                                                                                                                                   | Sweden NT; World Cup 1994, European Championship 1992 | Prospective cohort study | Professional                          | -                                      | -                                 | 6 years: 1991-1997                                              |
| Ekstrand et al., 2011a [11] | Injury incidence and injury patterns in professional football - the UEFA injury study                                                                                                                      | Europe Sweden                                         | Prospective cohort study | Professional UCL* SWE*                | 2226                                   | 25.7±4.5                          | 2 Seasons each: 2001-2008                                       |
| Ekstrand et al., 2011b [33] | Epidemiology of muscle injuries in professional football (soccer)                                                                                                                                          | Sweden: UCL; SWE; ART                                 | Prospective cohort study | Professional footballers              | 2299                                   | 25.3±4.6                          | 9 Seasons: 2001-2009                                            |
| Fischer et al., 2017 [62]   | Injuries in amateur football. Collecting data for injury prevention                                                                                                                                        | Austria                                               | Prospective cohort study | Amateur footballers, level 3-4        | 127                                    | 21.9±4.5                          | 1 Season                                                        |
| Gebert et al., 2018 [29]    | Changes in injury incidences and causes in Swiss amateur soccer between the years 2004 and 2015                                                                                                            | Switzerland                                           | Retrospective study      | Amateur footballers                   | -                                      | Different ages                    | 3 Years: 2004, 2008, 2015                                       |
| Häggland et al., 2005a [16] | Injury incidence and distribution in elite football-a prospective study of the Danish and the Swedish top divisions                                                                                        | Denmark Sweden                                        | Prospective cohort study | Elite Professional                    | 188<br>310                             | 26±4<br>25±5                      | January-June 2001<br>January November                           |
| Hägglund et al., 2006 [17]  | Previous injury as a risk factor for injury in elite football: a prospective study over two consecutive seasons.                                                                                           | Sweden                                                | Prospective cohort study | Elite Professional                    | 263;<br>262                            | 25 ±5<br>25±5                     | January. 2001-November 2002 (2 Seasons)                         |
| Hägglund et al., 2007a 49   | Epidemiology and prevention of football injuries                                                                                                                                                           | Sweden Sweden Denmark Sweden                          | Prospective study        | Elite Professional, Top division      | 118<br>310<br>188<br>239               | 25±3<br>25 ±5<br>26 ±4<br>25 ±5   | Ian-Oct. 1982<br>Ian-Oct 2001<br>Ian-Oct. 2001<br>Ian-Oct. 2001 |
| Hägglund et al., 2009 [45]  | UEFA injury study - An injury audit of European Championships 2006 to 2008                                                                                                                                 | European Championship                                 | UEFA Study               | Professional footballers;<br><br>U-21 | 176 (2006)<br>182 (2007)<br>367 (2008) | 27.2±4.0<br>21.6 ±1.2<br>21.3±1.3 | Championships 2006 to 2008                                      |

|                                                                       |                                                                                                                                                                    |                                   |                                     |                                             |                       |                                  |                                                      |
|-----------------------------------------------------------------------|--------------------------------------------------------------------------------------------------------------------------------------------------------------------|-----------------------------------|-------------------------------------|---------------------------------------------|-----------------------|----------------------------------|------------------------------------------------------|
| Häggglund et al., 2013 [47]                                           | Injuries affect team performance negatively in professional football: an 11-year follow-up of the UEFA Champions League injury study                               | EURO League match UCL or EL match | Prospective cohort study            | Professional (9 European countries)         | 155 teams-seasons     | -                                | 11 Seasons 2001-1012                                 |
| Häggglund et al., 2016 [19]                                           | Injury recurrence is lower at the highest professional football level than at national and amateur levels: does sports medicine and sports physiotherapy deliver ? | Europe Sweden                     | Prospective cohort study            | Professional Elite Level-Top Amateur        | Players 2014 6956 241 | 25.2±4.8<br>25.4±4.6<br>24.0±5.3 | 2001-1015 14 Seasons                                 |
| Hammes et al., 2014 [63]                                              | Injury prevention in male veteran football players – a randomized controlled trial using “FIFA 11+”.                                                               | Germany                           | Prospective cohort study            | Veteran amateur soccer players, Level 1-3   | 265                   | 45±8                             | 2011-2012                                            |
| Hawking et al., 1999 [13]                                             | A prospective epidemiological study of injuries in four English professional football clubs                                                                        | England                           | 4 English leagues, competition      | Professional                                | 108                   | -                                | 1994-1997 November-May, 407 weeks                    |
| Herrero et al., 2014 [64]                                             | Injuries among Spanish male amateur soccer players: a retrospective population study                                                                               | Spain                             | Retrospective epidemiological study | Amateur footballers                         | 134.570               | 18-55                            | 2010-2011                                            |
| Jones et al., 2019 [11]                                               | Epidemiology of injury in English Professional Football players: A cohort study                                                                                    | England                           | Prospective cohort study            | Professional English Football League; clubs | 243                   | 24.3±4.21                        | 1 Season July 2015-May 2016                          |
| Kekelekis et al., 2023 [30]                                           | Epidemiology of Injuries in Amateur Male Soccer Players: A Prospective One-Year Study                                                                              | Greece                            | Prospective cohort study            | Amateur footballers                         | 152                   | 21.32±7.42                       | 1 Season 2018-2019 (26 Weeks)                        |
| Kordi et al., 2011 [56]:<br>Earth Field (DF)<br>Artificial Turf (ATF) | Comparison of the incidence, nature and cause of injuries sustained on dirt field and artificial turf field by amateur football players                            | Iran                              | Prospective cohort study            | Amateur footballers                         | DF 252<br>ATF 216     | 27.0 (18-43)<br>28 (17-40)       | 13 Weeks                                             |
| Lee et al., 2014 [48]                                                 | A prospective epidemiological study of injury incidence and injury patterns in a Hong Kong male professional football league during the competitive season.        | Asia Hong Kong                    | Prospective study                   | Professional                                | 152                   | 25.0±4.3                         | 1 Season: September. 2010- May 2011                  |
| Mallo et al., 2011 [49]                                               | Injury Incidence in a Spanish Sub-Elite Professional Football Team: A Prospective Study During Four Consecutive Seasons                                            | Spain                             | Prospective cohort study            | Professional Sub-elite teams; Division II   | 88                    | 24.8±3.5                         | 4 Seasons: 2003-2004; 2004-2005; 2005-2006 2006-2007 |

|                                   |                                                                                                                                                                                                |             |                                          |                                   |                       |                              |                                            |
|-----------------------------------|------------------------------------------------------------------------------------------------------------------------------------------------------------------------------------------------|-------------|------------------------------------------|-----------------------------------|-----------------------|------------------------------|--------------------------------------------|
| Martins et al., 2022 [50]         | Sports Injuries of a Portuguese Professional Football Team during Three Consecutive Seasons                                                                                                    | Portugal    | Prospective operational study            | Professional Premier league       | 71                    | 25.7±3.4                     | 3 Seasons: 2019-2020; 2020/2021; 2021-2022 |
| Morgan et al., 2001 [60]          | An examination of injuries in Major League Soccer: the inaugural season                                                                                                                        | SUA         | Prospective cohort study                 | Professional High level           | 237                   | 27.0                         | 7 Months (1 Season)                        |
| Murphy et al., 2012 [51]          | Incidence of Injury in Gaelic Football: A 4-Year Prospective Study                                                                                                                             | Ireland     | Descriptive epidemiological study        | Professional Elite teams in Wales | 851                   | 18-36                        | 4 Seasons: 2007-2010                       |
| Nogueira et al., 2017 [28]        | Injuries in Portuguese Amateur Youth Football Players: A Six Month Prospective Descriptive Study                                                                                               | Portugal    | Descriptive observational study          | Amateur soccer players U19        | 239                   | 18-19                        | November 2015- April 2016                  |
| Noya Salces et al., 2014b [53]    | An examination of injuries in Spanish professional soccer League                                                                                                                               | Spain       | Prospective cohort study                 | Professional Second division      | 301                   | 26,4±4,0                     | 1 Season: 2008-2009                        |
| Noya Salces et al., 2014a [54]    | Epidemiology of injuries in First Division Spanish football                                                                                                                                    | Spain       | Prospective cohort study                 | Professional Premier League       | 427                   | 26.8±4.1                     | 6 July 2008-23 August 2009                 |
| Parry and Drust et al., 2006 [55] | Is injury the major cause of elite soccer players being unavailable to train and play during the competitive season?                                                                           | England     | Descriptive epidemiological study        | Professional Division I           | 55                    | 24.0±5                       | Competitive season 2003-2004 2004-2005     |
| Reis et al., 2015 [56]            | Sports injuries profile of a first division Brazilian soccer team: a descriptive cohort study                                                                                                  | Brazil      | Prospective cohort study                 | Professional First division       | 48                    | 25.2±4.5                     | 1 Season                                   |
| Roe et al., 2018 [57]             | Time to get our four priorities right: an 8-year prospective investigation of 1326 player-seasons to identify the frequency, nature, and burden of time-loss injuries in elite Gaelic football | Ireland     | Prospective study                        | Professional                      | 1326 player - seasons | Different ages (18-40 years) | 8 Years, 2008-2016                         |
| Shalaj et al., 2016 [58]          | Injuries in professional male football players in Kosovo: a descriptive epidemiological study                                                                                                  | Kosovo      | Prospective cohort study                 | Professional footballers          | 143                   | 23.2±4.1                     | 1 Season, 2013-2014                        |
| Sousa et al., 2012 [26]           | Injuries in amateur soccer players on artificial turf: A one-season prospective study                                                                                                          | Portugal    | Prospective cohort study                 | Amateur footballers               | 231                   | 24.7 (18-38)                 | 1 Season August. 2010-Mai 2011             |
| Stubbe et al., 2015 [59]          | Injuries in Professional Male Soccer Players in the Netherlands: A Prospective Cohort Study                                                                                                    | Netherlands | Prospective epidemiological cohort study | Professional First league         | 217                   | 24.6±4.3                     | 31 July 2009-2 May 2010                    |
| Waldén et al., 2005a [60]         | UEFA Champions League study: a prospective study of injuries in professional                                                                                                                   | Europe      | Prospective cohort study                 | Professional High level           | 266                   | 26±4                         | 9 Months(July 2001-May 2002)               |

|                                     |                                                                                                                               |             |                                     |                                            |                         |                   |                                                                 |
|-------------------------------------|-------------------------------------------------------------------------------------------------------------------------------|-------------|-------------------------------------|--------------------------------------------|-------------------------|-------------------|-----------------------------------------------------------------|
|                                     | football during the 2001-2002 season                                                                                          |             |                                     |                                            |                         |                   |                                                                 |
| Waldén et al., 2005b [4]            | Injuries in Swedish elite football: a prospective study on injury definitions, risk for injury and injury pattern during 2001 | Sweden      | Prospective cohort study            | Professional Top level                     | 310                     | 25 (17-28)        | 2001 (January-October)                                          |
| Waldén et al., 2007 [61]            | Football injuries during European Championships 2004–2005                                                                     | Europe      | Prospective study                   | Professional EURO 2004 WOCO 2005 U-19 2005 | 672: 368 160 144        | -                 | 12 June-7 July; 2004; 5 June-19 July 2005; 18 July-29 July 2005 |
| Van Beijsterveldt et al., 2012 [27] | Effectiveness of an injury prevention programme for adult male amateur soccer players: A cluster-randomized controlled trial  | Netherlands | Cluster randomized controlled trial | Amateur footballers                        | 223 (INT) 233 (Control) | 24.4±4.1 25.1±4.3 | 2009-2010                                                       |

\*UCL- UEFA Champions League; SWE-Swedish First League; ART-Artificial Turf Field; - non provide

**Table S4** Characteristics of the studies included in the review: Epidemiological descriptors Methodological quality

| Reference Country / Tournament            | Study duration                    | No teams Players   | Exposure (Hours) |            |           | Injuries |          |       | Incidence |          |       | Strobe Quality | NOS Methodological quality |
|-------------------------------------------|-----------------------------------|--------------------|------------------|------------|-----------|----------|----------|-------|-----------|----------|-------|----------------|----------------------------|
|                                           |                                   |                    | Overall          | Training   | Match     | Overall  | Training | Match | Overall   | Training | Match |                |                            |
| Arnason et al., 2005 [35]                 | May 1999-September 1999           | <u>15</u> 271      | 28,927           | 23,613     | 5,314     | 190      | 136      | 54    | 6.60      | 1.90     | 26.0  | 7              | 7                          |
| Aus der Fünften et al., 2014 [36]         | Season: 2008-2009 2009-2010       | <u>14</u> 372      | 48,285.6*        | 42,817.2 * | 5,468.4*  | 300      | 151      | 149   | 6.2*      | 3.5*     | 27.2* | 10             | 8                          |
| Aus der Fünften et al., 2023 [23]         | 7 Seasons: 2014/2015-2020/2021    | <u>25</u> 650      | 1,220,223.5      | 1,111,03   | 109,193.5 | 6,653    | 3,821    | 2,832 | 5.5       | 3.4      | 25.9  | 8              | 8                          |
| Bayne et al., 2018 [37]                   | 10 Months 2015-2016               | <u>2</u> 56        | 20,361           | 19,272*    | 1,089     | 33       | 15       | 18    | 1.6       | 0.8      | 16.5  | 8              | 6                          |
| Brito et al., 2012 [25]                   | August 2008-July 2009             | <u>14</u> 674 U-19 | 23.122           | 21.401     | 1.721     | 199      | 139      | 60    | 8.6       | 6.5      | 54.9  | 7              | 6                          |
| Dupont et al., 2010; France (G1, G2) [38] | 2 Seasons: 2007-2008 2008-2009    | <u>1</u> 32        | 18,495           | 16,339     | 2,156     | 165      | 105      | 60    | 8.9       | 3.7      | 48.7  | 8              | 8                          |
| Dvorak et al., 2011 [39]                  | 1 Year 2010                       | <u>32</u> 553      | -                | -          | -         | 229      | 104      | 125   | 9.20      | 7.9      | 61.1  | 7              | 5                          |
| Eirale et al., 2010 [40]                  | June 2007-October 2008, 17 Months | /36                | 10,043           | 9,482      | 561       | 78       | 41       | 37    | 7.8       | 4.3      | 66.0  | 9              | 7                          |
| Eirale et al., 2013 [41]                  | 1 Season: August 2009-April 2009  | <u>10</u> 239      | 36,020*          | 30,227*    | 5,793*    | 217      | 133      | 84    | 6.02*     | 4.4      | 14.5  | 7              | 7                          |

|                             |                                                |                                                                |                                 |                                 |                             |                        |                      |                        |                              |                           |                              |   |   |
|-----------------------------|------------------------------------------------|----------------------------------------------------------------|---------------------------------|---------------------------------|-----------------------------|------------------------|----------------------|------------------------|------------------------------|---------------------------|------------------------------|---|---|
| Ekstrand et al., 1990 [42]  | 1 Year                                         | <u>21</u><br>315                                               | 30,554<br>31,718                | 23,241<br>24,499                | 7,313<br>7,219              | 261<br>288             | 107*<br>-            | 159*<br>-              | 8.6<br>8.5                   | 4.6<br>5.1                | 21.8<br>18.7                 | 9 | 6 |
| Ekstrand et al., 2004a [43] | 6 Years: 1991-1997                             | /73                                                            | 7,245                           | 6,235                           | 1,010                       | 71                     | 40                   | 31                     | 10.0                         | 6.5                       | 30.3                         | 6 | 5 |
| Ekstrand et al., 2004b [44] | July 2001-May 2002                             | <u>11</u><br>266                                               | 70,000                          | 58,000                          | 12,000                      | -<br>-                 | -<br>-               | -<br>-                 | 7,9<br>9,5                   | 3,2<br>5,5                | 26,7<br>30,3                 | 7 | 5 |
| Ekstrand et al., 2011a [47] | 7 Seasons: 2001-2008                           | <u>88</u><br>2226                                              | 566,000                         | 475,000                         | 91,000                      | 4,483                  | 1,937                | 2,546                  | 8.0                          | 4.1                       | 27.7                         | 8 | 7 |
| Ekstrand et al., 2011b [14] | 2001-2009                                      | <u>51</u><br>2.299                                             | 1,175,000                       | 998,000                         | 177,000                     | 2,908                  | 1,541*               | 1,367*                 | 2.48                         | 1.37                      | 8.70                         | 8 | 7 |
| Fischer et al., 2017 [62]   | 1 Season                                       | <u>1</u><br>127                                                | 15,309                          | 12,195                          | 3,114                       | 62                     | 25                   | 37                     | 4.05                         | 2,05                      | 11,06                        | - | - |
| Gebert et al., 2018 [29]    | 2004<br>2008<br>2015                           | -<br>-<br>-                                                    | -<br>-<br>-                     | -<br>-<br>182,961               | -<br>-<br>-                 | -<br>-<br>1,601        | -<br>-<br>525        | -<br>-<br>1,076        | -<br>-<br>-                  | 2.4<br>2.2<br>2.9         | 15.1<br>13.3<br>16.5         | 6 | 5 |
| Hägglund et al., 2005a [16] | January 2001-June 2001                         | <u>8</u><br>188<br><u>14</u><br>310                            | 27,321<br>59,469                | 23,095<br>52,910                | 4,226<br>6,559              | 349<br>481             | 271<br>313           | 124<br>168             | 14.4<br>8.2                  | 11.8<br>6.0               | 28.2<br>26.2                 | 8 | 7 |
| Hägglund et al., 2006 [17]  | 2 Seasons: 2001 and 2002                       | 525                                                            | 155,867                         | 135,822                         | 20,045                      | 1,189                  | 701                  | 488                    | 7.6                          | 5.16                      | 24.2                         | 8 | 8 |
| Hägglund et al., 2007a [45] | Years: 1982, 2001, 2002, 2005                  | <u>48</u><br>933                                               | -                               | -                               | -                           | 715<br>588<br>548      | -                    | -                      | 8.3<br>7.8<br>7.6<br>7.7     | 4.6<br>5.2<br>5.3<br>4.7  | 20.6<br>25.9<br>22.7<br>28.1 | 8 | 7 |
| Hägglund et al., 2009 [46]  | Year: 2006<br><br>Year: 2007<br><br>Year: 2008 | <u>8</u><br>176<br><br><u>8</u><br>182<br><br><u>16</u><br>367 | 1,589<br><br>2,321<br><br>5,368 | 1,076<br><br>1,774<br><br>4,310 | 513<br><br>548<br><br>1,058 | 22<br><br>25<br><br>56 | 5<br><br>6<br><br>12 | 17<br><br>19<br><br>44 | 13.8<br><br>10.8<br><br>10.4 | 4.6<br><br>3.4<br><br>2.8 | 33.1<br><br>34.7<br><br>41.6 | 8 | 7 |
| Hägglund et al., 2013 [47]  | 11 Seasons 2001-1012                           | 155<br>Teams-<br>Seasons                                       | 1,026,114                       | -                               | -                           | 7,792                  | 3,395                | 4,397                  | 7.7                          | 4.0                       | 36.6                         | 8 | 5 |
| Hägglund et al., 2016 [19]  | 2001-2015                                      | 6,956<br>2,014<br>241                                          | -<br>-<br>-                     | -<br>-<br>-                     | -<br>-<br>-                 | 9,757<br>3,179<br>114  | -<br>-<br>-          | -<br>-<br>-            | 7.2<br>7.4<br>5.2            | 3.8<br>4.9<br>2.7         | 25.3<br>23.5<br>12.3         | 7 | 5 |
| Hammes et al., 2014 [52]    | 2011-2012; 9 Months                            | <u>18</u><br>265                                               | 7,109                           | 4,798                           | 2,311                       | 88                     | 31                   | 57                     | 12.37*                       | 6.46*                     | 24.66*                       | 7 | 6 |
| Hawking et al., 1999 [63]   | 1994-1997 407 Weeks                            | /108                                                           |                                 |                                 |                             | 578                    | 187                  | 391                    | 8.5                          | 27.7                      | 3.5                          | 8 | 7 |
| Herrero et al., 2014 [64]   | 1 Season 2010-2011                             | 134.570<br>Players                                             | -                               | -                               | -                           | 15,243                 | 10,256               | 4,987                  | -                            | 0.49                      | 1.15                         | 7 | 7 |
| Jones et al., 2019 [55]     | 1 Season 2015-2016                             | <u>10</u><br>243                                               | 56,075                          | 46,351                          | 9,724                       | 473                    | -                    | -                      | 9.11                         | 6.84                      | 24.29                        | 9 | 6 |



|                                                                       |                                     |                                             |                                  |                               |                         |                    |                |               |                      |                   |                          |    |    |
|-----------------------------------------------------------------------|-------------------------------------|---------------------------------------------|----------------------------------|-------------------------------|-------------------------|--------------------|----------------|---------------|----------------------|-------------------|--------------------------|----|----|
| Kekelekis et al., 2023 [30]                                           | 1 Season<br>2018-2019               | <u>11</u><br>152                            | 18,558                           | 15,909                        | 2,648                   | 103                | 48             | 55            | 5.5                  | 3.46              | 18.12                    | 9  | 8  |
| Kordi et al., 2011 [65]:<br>Earth Field (DF)<br>Artificial Turf (ATF) | 13 Weeks                            | <u>14</u><br>252<br><u>12</u><br><u>216</u> | 3275<br>1897<br><br>1,378        | -<br><br><br>                 | -<br><br><br>           | 97<br>70<br><br>27 | -<br><br><br>  | -<br><br><br> | -<br><br><br>        | -<br><br><br>     | 29.6<br>36.9<br><br>19.5 | 6  | 5  |
| Lee et al., 2014 [48]                                                 | 1 Season<br>2010-2011               | <u>10</u><br>152                            | 39,824*                          | 36,936*                       | 2,888*                  | 296                | -              | -             | 7.4                  | 3.4               | 61.6                     | 8  | 6  |
| Mallo et al., 2011 [49]                                               | 4 Seasons,<br>2003-2007             | <u>1</u><br>88                              | 28,694                           | 24,509                        | 4,185                   | 313                | 129            | 184           | 10,9                 | 5.2               | 44.1                     | 8  | 7  |
| Martins et al., 2022 [50]                                             | 2019-2020<br>2020-2021<br>2021-2022 | <u>3</u><br>104                             | 7,821.6*<br>7,794.3*<br>8,430.0* | 7,179.5<br>7,154.8<br>7,780.0 | 642.1<br>639.6<br>650.0 | 26<br>34<br>24     | 17<br>20<br>17 | 9<br>14<br>7  | 3.3*<br>4.4*<br>2.8* | 2.4<br>2.8<br>2.2 | 14.0<br>21.9<br>10.8     | 8  | 6  |
| Morgan et al., 2001 [51]                                              | 1 Season 7<br>Months                | <u>10</u><br><u>237</u>                     | -                                | -                             | -                       | 256                | -              | -             | 6.2                  | 2.9               | 35.3                     | 7  | 5- |
| Murphy et al., 2012 [52]                                              | 4 Seasons<br>2007-2010              | /851                                        | 106,890                          | 97,950                        | 8,940                   | 1014               | 397            | 553           | 8.89*                | 4.05              | 61.86                    | 7  | 7  |
| Nogueira et al., 2017 [28]                                            | November<br>2015-April<br>2016      | <u>21</u><br>529                            | 66,062                           | 53,159.5                      | 8,902.5                 | 248                | 119            | 129           | 3.87                 | 2.06              | 14.22                    | 8  | 7  |
| Noya Salces et al., 2014b [53]                                        | 2008-2009                           | <u>11</u><br>301                            | 161,602.7                        | 153,567.2                     | 8,035.5                 | 891                | 579            | 312           | 5,51                 | 3,77              | 38,83                    | 9  | 8  |
| Noya Salces et al., 2014a [54]                                        | July 2008-<br>May 2009              | <u>16</u><br>427                            | 229,443                          | 216,705                       | 12,738                  | 1,293              | 769            | 524           | 5.65                 | 3.55              | 43.53                    | 9  | 8  |
| Parry and Drust et al., 2006 [55]                                     | 2003-2005                           | /55                                         | 13,346*                          | 10,742                        | 2,604                   | 83*                | 19*            | 64*           | 6,2                  | 1,8               | 24,6                     | 7  | 5  |
| Reis et al., 2015 [56]                                                | 1 Season<br>(334 days)              | <u>1</u><br>48                              | 13,040*                          | 12,083*                       | 957*                    | 70                 | 29             | 41            | 5.37*                | 2.40              | 42.84                    | 8  | 7  |
| Roe et al., 2018 [57]                                                 | 8 Years                             | -                                           | 177,854                          | 159,866                       | 17,988                  | 1512*              | 616            | 896           | 8,50*                | 3,85              | 49,8                     | 8  | 7  |
| Shalaj et al., 2016 [58]                                              | 2013-2014                           | <u>11</u><br>143                            | 36,833                           | 31,998                        | 4,834                   | 272                | 101            | 171           | 7.38                 | 3.16              | 35.37                    | 9  | 7  |
| Sousa et al., 2012 [26]                                               | August<br>2010-May<br>2011          | <u>11</u><br>231                            | 43,872                           | 38,554                        | 5,318                   | 213                | 92             | 121           | 4.86*                | 2.39*             | 22.75*                   | 8  | 7  |
| Stubbe et al., 2015 [68]                                              | 31 July<br>2009-2<br>May 2010       | <u>8</u><br>217                             | 46,194                           | 41,012                        | 5,182                   | 286                | 170            | 116           | 6.2                  | 2.8               | 32.8                     | 11 | 7  |
| Waldén et al., 2005a [59]                                             | 9 Months<br>July 2001-<br>May 2002  | <u>11</u><br>266                            | 69,707                           | 58,149                        | 11,558                  | 658                | 298            | 360           | 9.4                  | 5.8               | 30.5                     | 8  | 6  |
| Waldén et al., 2005b [4]                                              | Ianuar-<br>Octomber<br>2001         | <u>14</u><br>310                            | 93,353                           | 81,801                        | 11,552                  | 715                | 421            | 294           | 7.66*                | 5.15*             | 25.45*                   | 8  | 7  |
| Waldén et al., 2007 [61]                                              | European<br>Champion<br>-ships      | <u>32</u><br>672                            | 7,957:                           | 5,907                         | 2,050                   | 80                 | 12             | 68            | 10.1                 | 2.03              | 33.2                     | 8  | 7  |
| Van Beijsterveldt et al., 2012 [27]                                   | 1 Season<br>2009-2010               | <u>23</u><br>456                            | 44,252                           | 31,518                        | 12,734                  | 424                | -              | -             | 9.6                  | 3.4               | 21.9                     | 8  | 8  |

**Table S5** Analysis of the selected studies' methodological quality - STROBE (n = 46) (von Elm et al., 2014 [119])

| Study: Author, Year | 1 | 2 | 3 | 4 | 5 | 6 | 7 | 8 | 9 | 10 | 11 | Scoring |
|---------------------|---|---|---|---|---|---|---|---|---|----|----|---------|
|---------------------|---|---|---|---|---|---|---|---|---|----|----|---------|

|                                     |   |   |   |   |   |   |   |   |   |   |   |                  |
|-------------------------------------|---|---|---|---|---|---|---|---|---|---|---|------------------|
| Arnason et al., 2005 [35]           | + | - | - | - | - | + | + | + | + | - | + | 7                |
| Aus der Fünten et al., 2014 [36]    | + | + | + | + | + | + | + | + | + | - | + | 10               |
| Aus der Fünten et al., 2023 [23]    | + | + | - | - | + | + | + | + | + | - | + | 8                |
| Bayne et al., 2018 [37]             | + | + | + | - | - | + | + | + | + | - | + | 8                |
| Brito et al., 2012 [25]             | + | - | - | - | + | + | + | + | - | - | + | 7                |
| Dvorak et al., 2011 [38]            | + | - | - | - | + | - | + | + | + | - | + | 7                |
| Dupont et al., 2010; France [39]    | + | + | + | - | - | + | + | + | + | - | + | 8                |
| Eirale et al., 2010 [40]            | + | + | + | - | + | + | + | + | + | - | + | 9                |
| Eirale et al., 2013 [41]            | + | + | + | - | + | - | + | + | - | - | + | 7                |
| Ekstrand et al., 1990 [42]          | + | - | - | - | - | - | + | + | + | - | + | 5                |
| Ekstrand et al., 2004a [43]         | + | + | - | - | - | + | + | - | + | - | + | 6                |
| Ekstrand et al., 2004b [44]         | + | + | - | - | + | + | + | + | - | - | + | 7                |
| Ekstrand et al., 2011a [14]         | + | + | + | - | - | + | + | + | + | - | + | 8                |
| Ekstrand et al., 2011b [14]         | + | + | + | - | - | + | + | + | + | - | + | 8                |
| Fischer et al., 2017 [62]           | + | + |   |   |   |   |   |   |   |   | + |                  |
| Gebert et al., 2018 [29]            | + | + | + | - | - | + | + | + | - | - | - | 6                |
| Hägglund et al., 2005a [16]         | + | + | - | + | - | + | + | + | + | - | + | 8                |
| Hägglund et al., 2006 [17]          | + | + | - | + | - | + | + | + | + | - | + | 8                |
| Hägglund et al., 2007a [45]         | + | + | + | - | - | + | + | + | + | - | + | 8                |
| Hägglund et al., 2009 [46]          | + | + | + | - | - | + | + | + | + | - | + | 8                |
| Hägglund et al., 2013 [47]          | + | + | + | - | - | + | + | + | - | + | + | 8                |
| Hägglund et al., 2016 [19]          | + | + | + | - | - | + | + | + | - | - | + | 7                |
| Hammes et al., 2014 [63]            | + | + | + | - | - | + | + | - | + | - | + | 7                |
| Hawking et al., 1999 [13]           | + | + | - | - | + | + | + | + | + | - | + | 8                |
| Herrero et al., 2014 [64]           | + | + | + | - | - | + | + | + | + | - | - | 7                |
| Jones et al., 2019 [11]             | + | + | + | + | - | + | + | + | + | - | + | 9                |
| Kekelekis et al., 2023 [30]         | + | + | + | + | - | + | + | + | + | - | + | 9                |
| Kordi et al., 2011 [65]:            | + | + | + | - | - | + | + | - | - | - | + | 6                |
| Lee et al., 2014 [48]               | + | + | + | - | - | + | + | + | + | - | + | 8                |
| Mallo et al., 2011 [49]             | + | + | + | - | - | + | + | + | + | - | + | 8                |
| Martins et al., 2022 [50]           | + | + | + | - | - | + | + | + | + | - | + | 8                |
| Morgan et al., 2001 [51]            | + | + | + | - | - | + | + | + | - | - | + | 7                |
| Murphy et al., 2012 [52]            | + | + | + | - | - | + | + | + | - | - | + | 7                |
| Nogueira et al., 2017 [28]          | + | + | + | - | - | + | + | + | + | - | - | 8                |
| Noya Salces et al., 2014b [53]      | + | + | + | + | - | + | + | + | + | - | + | 9                |
| Noya Salces et al., 2014a [54]      | + | + | + | + | - | + | + | + | + | - | + | 9                |
| Parry and Drust et al., 2006 [55]   | + | + | - | - | - | + | + | + | + | - | + | 7                |
| Reis et al., 2015 [56]              | + | + | - | - | - | + | + | + | + | - | + | 8                |
| Roe et al., 2018 [57]               | + | + | + | - | - | + | + | + | + | - | + | 8                |
| Shalaj et al., 2016 [58]            | + | + | + | - | + | + | + | + | + | - | + | 9                |
| Sousa et al., 2012 [26]             | + | + | - | + | - | + | + | + | + | - | + | 8                |
| Stubbe et al., 2015 [59]            | + | + | + | + | + | + | + | + | + | + | + | 11               |
| Waldén et al., 2005a [60]           | + | + | - | - | + | + | + | + | + | - | + | 8                |
| Waldén et al., 2005b [4]            | + | + | + | - | - | + | + | + | + | - | + | 8                |
| Waldén et al., 2007 [61]            | + | + | - | + | - | + | + | + | + | - | + | 8                |
| Van Beijsterveldt et al., 2012 [27] | + | + | + | - | - | + | + | + | + | - | + | 8                |
| <b>Average value ± SD</b>           |   |   |   |   |   |   |   |   |   |   | + | <b>8.55±0.69</b> |

The numbers of the columns corresponded to the following items of the STROBE scale: 1. Describes the setting or participating locations; 2. Describes relevant dates (period of recruitment, exposure, follow-up, data collection); 3. Provides statement concerning institutional review board approval and consent; 4. Gives the inclusion and exclusion criteria; 5. Describes injury history; 6. Describes methods of follow-up; 6. Data sources/measurement; 7. Provides a definition of injury; 8. Verifies injury by an independent medical professional; 9. Classifies injury (severity, location and type of injury); 10. Indicates the number of participants with missing data and explain how this was addressed; 11. Measures and presents exposure data.

**Table S6** Risk of bias assessment of the studies (Newcastle-Ottawa scale; n=46).

| Study: Author, Year               | 1 | 2 | 3  | 4 | 5 | 6 | 7 | 8 | Scoring*/<br>Risk |
|-----------------------------------|---|---|----|---|---|---|---|---|-------------------|
| Arnason et al., 2005 [35]         | - | * | *  | * | * | * | * | * | 7/Low             |
| Aus der Fünten et al., 2014 [36]  | * | * | *  | * | * | * | * | * | 8/Low             |
| Aus der Fünten et al., 2023 [23]  | - | * | *  | * | * | - | * | * | 6/Moderate        |
| Bayne et al., 2018 [37]           | * | * | *  | - | * | - | * | * | 6/Moderate        |
| Brito et al., 2012 [25]           | - | * | *  | - | * | * | - | * | 5/High            |
| Dvorak et al., 2011 [38]          | * | * | *  | * | * | * | * | * | 8/Low             |
| Dupont et al., 2010; France [39]  | * | * | *  | * | * | * | * | - | 7/Low             |
| Eirale et al., 2010 [40]          | * | * | *  | * | * | * | * |   | 7/Low             |
| Eirale et al., 2013 [41]          | * | * | *  | - | * | * | - | * | 6/Moderate        |
| Ekstrand et al., 1990 [42]        | * | * | *  | - | * | - | * | - | 5/High            |
| Ekstrand et al., 2004a [43]       | - | * | *  | * | * | - | * | * | 6/Moderate        |
| Ekstrand et al., 2004b [44]       | * | * | *  |   | * | * | * | * | 7/Low             |
| Ekstrand et al., 2011a [14]       | * | * | *  | - | * | * | * | * | 7/Low             |
| Ekstrand et al., 2011b [14]       | * | * | *  | - | * | * | * | - | 6/Moderate        |
| Fischer et al., 2017 [62]         | * | * | *  | - | * | * | - | - | 5/High            |
| Gebert et al., 2018 [29]          | * | * | *  | * | * | * | * |   | 7/Low             |
| Häggland et al., 2005a [16]       | * | * | *  | * | * | * | * | * | 8/Low             |
| Hägglund et al., 2006 [17]        | * | * | *  | * | * | * | * | - | 7/Low             |
| Hägglund et al., 2007a [45]       | * | * | *  | * | * | * | * | - | 7/Low             |
| Hägglund et al., 2009 [46]        | * | * | *  | - | * | - | * | - | 5/High            |
| Hägglund et al., 2013 [47]        | * | * | *  | - | * | - | * | - | 5/High            |
| Hägglund et al., 2016 [19]        | * | * | *  | - | * | * | * | - | 6/Moderate        |
| Hammes et al., 2014 [63]          | * | - | *  | * | * | * | * | * | 7/Low             |
| Hawking et al., 1999 [13]         | * | * | *  | * | * | - | * | * | 7/Low             |
| Herrero et al., 2014 [64]         | * | * | *  | - | * | * | * | - | 6/Moderate        |
| Jones et al., 2019 [11]           | * | * | *  | * | * | * | * | * | 8/Low             |
| Kekelekis et al., 2023 [30]       | * | * | *  | - | * | - | * | - | 5/High            |
| Kordi et al., 2011 [65]:          | * | * | *  | - | * | * | * | - | 6/Moderate        |
| Lee et al., 2014 [48]             | * | * | *  | - | * | * | * | * | 7/Low             |
| Mallo et al., 2011 [49 ]          | * | * | *  | - | * | - | * | * | 6/Moderate        |
| Martins et al., 2022 [50]         | * | * | *  | - | * | - | * | * | 6/Moderate        |
| Morgan et al., 2001 [51]          | * | * | *  | - | * | * | * | * | 7/Low             |
| Murphy et al., 2012 [52]          | * | * | *  | * | * | * | * | - | 7/low             |
| Nogueira et al., 2017 [28]        | * | * | *  | * | * | * | * | * | 8/Low             |
| Noya Salces et al., 2014b [53]    | * | * | *  | * | * | * | * | * | 8/Low             |
| Noya Salces et al., 2014a [54]    | * | * | *_ | - | * | - | - | * | 5/High            |
| Parry and Drust et al., 2006 [55] | * | * | *  | * | * | * | * | * | 8/Low             |
| Reis et al., 2015 [56]            | * | * | *  | - | * | - | * | * | 6/Moderate        |
| Roe et al., 2018 [57]             | * | * | *  | - | * | * | * | * | 7/Low             |
| Shalaj et al., 2016 [58]          | * | * | *  |   | * | * | * | * | 7/Low             |
| Sousa et al., 2012 [26]           | * | * | *  | - | * | * | * | * | 7/Low             |
| Stubbe et al., 2015 [59]          | * | * | *  | - | * | - | * | * | 6/Moderate        |
| Waldén et al., 2005a [60]         | * | * | *  | * | * | * | - | * | 7/Low             |
| Waldén et al., 2005b [4]          | * | * | *  | - | * | * | - | * | 7/Low             |
| Waldén et al., 2007 [61]          | * | * | *  | * | * | * | * | * | 8/Low             |
| <b>Average value ±SD</b>          |   |   |    |   |   |   |   |   | <b>6.63±0.8</b>   |

1. Study setting (Description type of football players; location and period); 2. Definition of injury; 3. Representativeness of exposed cohort; 4. Exposure defining and measuring; 5. Demonstration that the outcome of interest was not present at the beginning of the study; 6. Evaluation of the results; 7. There was a long enough follow-up for the results to occur; 8. Adequacy of cohort monitoring;

\*Number of items with risk low of BIAS
